# Supplementary material
Source: PubMed Central journal article supplement (PMC3227088)
Supplement: 125_2009_1392_MOESM1_ESM.pdf [file 125_2009_1392_MOESM1_ESM.pdf]

## Electronic supplementary material

### Members of the RISC Consortium

|                     |                                                                                                                                                  |
|---------------------|--------------------------------------------------------------------------------------------------------------------------------------------------|
| Amsterdam           | R. J. Heine, J. Dekker, G. Nijpels, W. Boorsma, A. Kok                                                                                           |
| Athens              | A. Mitrakou, S. Tournis, K. Kyriakopoulou, P. Thomakos                                                                                           |
| Belgrade            | N. Lalic, K. Lalic, A. Jotic, L. Lukic, M. Civcic                                                                                                |
| Dublin              | J. Nolan, T. P. Yeow, M. Murphy, C. DeLong, G. Neary, M. P. Colgan, M. Hatunic, P. Gaffney, G. Boran                                             |
| Frankfurt           | T. Konrad, H. Böhles, S. Fuellert, F. Baer, H. Zuchhold                                                                                          |
| Geneva              | A. Golay, E. Harsch Bobbioni, V. Barthassat, V. Makoundou, T. N. O. Lehmann, T. Merminod                                                         |
| Glasgow             | J. R. Petrie (now Dundee), C. Perry, F. Neary, C. MacDougall, K. Shields, L. Malcolm                                                             |
| Kuopio              | M. Laakso, U. Salmenniemi, A. Aura, R. Raisanen, U. Ruotsalainen, T. Sistonen, M. Laitinen, H. Saloranta                                         |
| London              | S. W. Coppack, N. McIntosh, P. Khadobaksh                                                                                                        |
| Lyon                | M. Laville, F. Bonnet, A. Brac de la Perriere, C. Louche-Pelissier, C. Maitrepierre, J. Peyrat, A. Serusclat                                     |
| Madrid              | R. Gabriel, E. M. Sánchez, R. Carraro, A. Frieria, B. Novella                                                                                    |
| Malmö               | P. Nilsson, M. Persson, G. Östling, O. Melander, P. Burri                                                                                        |
| Milan               | P. M. Piatti, L. D. Monti, E. Setola, E. Galluccio, F. Minicucci, A. Colleluori                                                                  |
| Newcastle upon Tyne | M. Walker, I. M. Ibrahim, M. Jayapaul, D. Carman, K. Short, Y. McGrady, D. Richardson, L. Pascoe, S. Patel                                       |
| Odense              | H. Beck-Nielsen, P. Staehr, K. Hojlund, V. Vestergaard, C. Olsen, L. Hansen                                                                      |
| Padova              | A. Mari, G. Pacini, C. Cavaggion                                                                                                                 |
| Paris               | B. Balkau, L. Mhamdi, M. T. Guillanneuf                                                                                                          |
| Perugia             | G. B. Bolli, F. Porcellati, C. Fanelli, P. Lucidi, F. Calcinaro, A. Saturni                                                                      |
| Pisa                | E. Ferrannini, A. Natali, E. Muscelli, S. Pinnola, M. Kozakova, B. D. Astiarraga, S. A. Hills, L. Landucci, L. Mota, A. Gastaldelli, D. Ciociaro |
| Rome                | G. Mingrone, C. Guidone, A. Favuzzi, P. Di Rocco                                                                                                 |
| Vienna              | C. Anderwald, M. Bischof, M. Promintzer, M. Krebs, M. Mandl, A. Hofer, A. Luger, W. Waldhäusl, M. Roden                                          |
